# Supplementary material
Source: Research Square preprint supplement (doi:10.21203/rs.3.rs-9174718/v1)
Supplement: Supplementary file 1 [file 0ae47217f8e3d088b123dfb6.docx]

**Table 2** Average recovery and coefficient of variation of the added samples (n=5)

| Sample | Spiked  (ng/ml) | This sensor | | | HPLC | | |
| --- | --- | --- | --- | --- | --- | --- | --- |
| Found  (ng/ml) | Recovery  (%) | CV  (%) | Found  (ng/ml) | Recovery  (%) | CV  (%) |
| Domestic  soil | 30 | 33.62 | 105.43 | 9.29 | 30.64 | 102.15 | 5.45 |
| 60 | 59.69 | 95.15 | 6.77 | 61.80 | 102.99 | 6.10 |
| 90 | 95.24 | 105.82 | 5.64 | 93.74 | 104.15 | 3.62 |
| Soil for  aquaculture | 30 | 33.62 | 112.06 | 15.25 | 31.22 | 104.08 | 4.87 |
| 60 | 59.05 | 105.09 | 8.71 | 55.44 | 92.40 | 2.20 |
| 90 | 90.60 | 100.67 | 5.10 | 89.82 | 99.80 | 5.19 |
| Domestic  Water | 30 | 31.35 | 104.4 | 12.23 | 29.88 | 99.58 | 3.99 |
| 60 | 58.32 | 97.2 | 7.16 | 60.48 | 100.80 | 6.10 |
| 90 | 88.02 | 102.24 | 4.56 | 91.92 | 102.14 | 2.11 |
| Water for  aquaculture | 30 | 31.82 | 106.07 | 14.48 | 30.28 | 100.95 | 3.89 |
| 60 | 56.90 | 94.84 | 7.09 | 59.78 | 99.64 | 4.16 |
| 90 | 90.28 | 106.98 | 3.77 | 90.92 | 101.02 | 6.39 |
