# Supplementary material
Source: Research Square preprint supplement (doi:10.21203/rs.3.rs-9174718/v1)
Supplement: Supplementary file 2 [file 91d86d64da6eb3b019bbebce.docx]

## Selection of a High-Affinity Nitrofurantoin-Specific Aptamer via GO-SELEX and Development of a Fluorescent Aptasensor for Environmental Water Monitoring

## 1. Figure


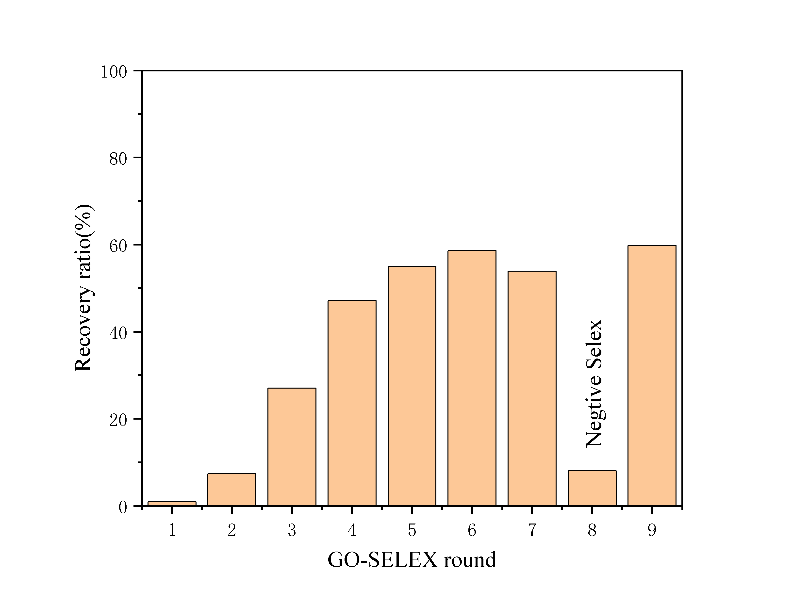


**Figure S1** Recovery of sequences bound to NFT in GO-SELEX


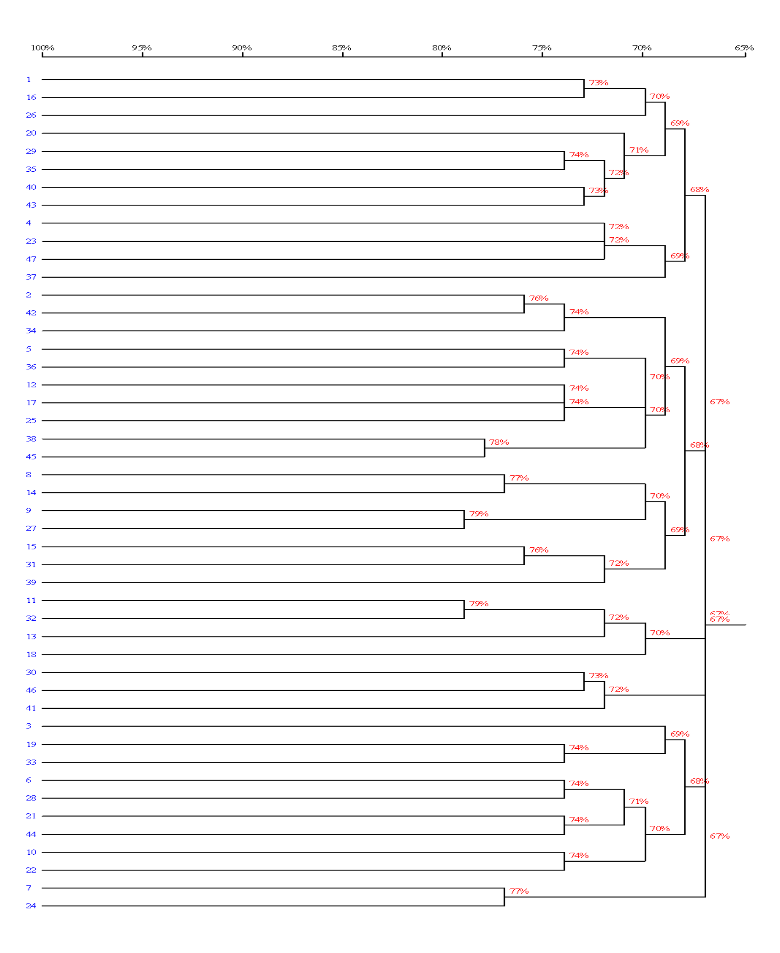


**Figure S2** Homologous tree analysis


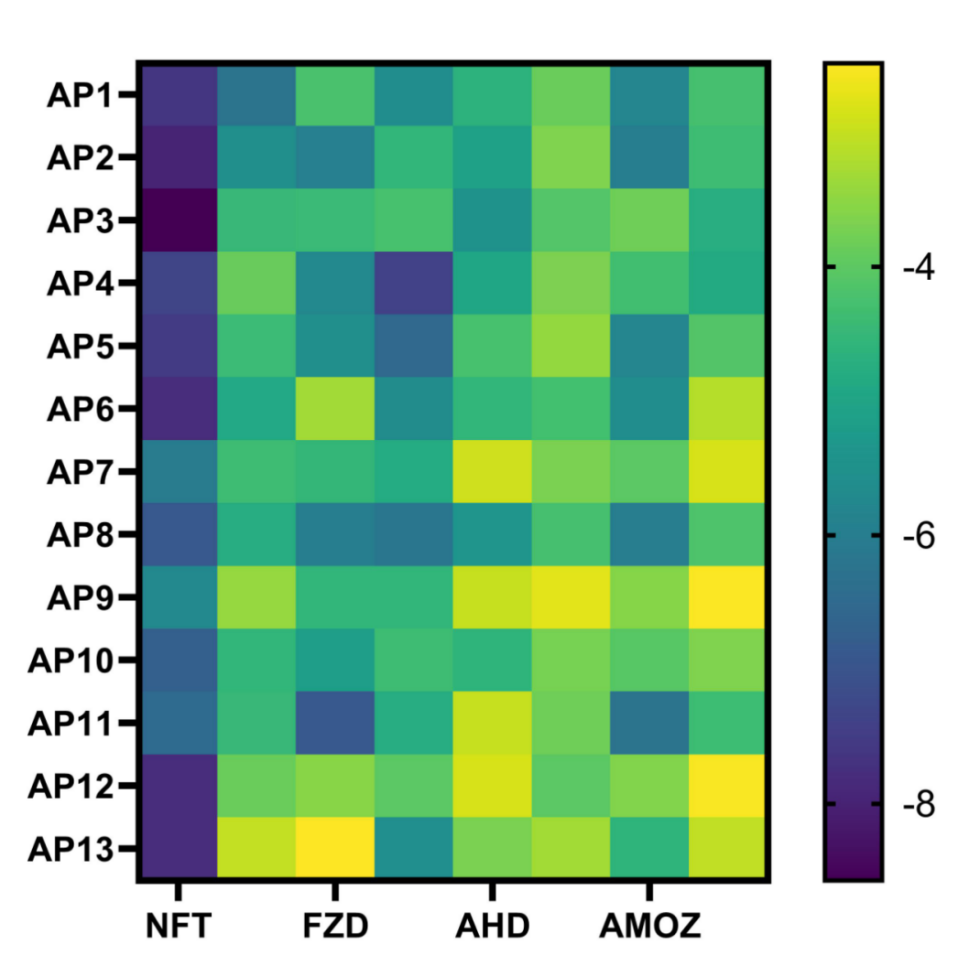


**Figure S3** Molecular docking heatmaps of candidate aptamers from different families with NFT and its analogs

## 2.Table

**Table S1** All oligonucleotide sequences

| Name | Sequence |
| --- | --- |
| FAM-Random ssDNA library | 5’-FAM-CACCTAATACGACTCACTATAGCGGATCCGA-N40-CTGGCTCGAACAAGCTTGC-3’ |
| FAM-Forward Primer | GGCTCGAACAAGCTTGC-3’ |
| Reverse Primer | 5’-FAM-CACCTAATACGACTCACTATAGCGGA-3’ |
| Reverse Primer | 5’-GCAAGCTTGTTCGAGCCAG-3’ |
| Biotin ssDNA | 5’-biotin-GCAAGCTTGTTCGAGCCAG-3’ |

**Table S2** PCR reaction condition

| Components | Volume/µL |
| --- | --- |
| SSDNA | 5 |
| 25 nM reverse primer | 2 |
| 500 nM forword primer | 2 |
| 2×taq PCR MasterMix Ⅱ | 10 |
| DdH2O | 31 |

**Table S3** PCR reaction program

| Procedure | Temperature/℃ | Time/s |
| --- | --- | --- |
| Denatured | 95 | 0.30 |
| Renatured | 53.5 | 0.30 |
| extended | 72 | 0.06 |

**Table S4** Random sequence of aptamers

| Aptamers | Random sequence (N40) |
| --- | --- |
| Seq-1 | ATCTACACCGGTAGGATTCGGTCTGGACCCTCCGCTCTCC |
| Seq-2 | AGTGCCCGGGGGTATTGCGAATACGCTGAGGATTTAGGGT |
| Seq-3 | GGCCTCGGCGTAGACCACCCGAGATCGCTTACGGAGGTGT |
| Seq-4 | TCTCTGATGGGTCTGGGGGTCCAAGCGATACTTTAGGTGA |
| Seq-5 | CGTCCGAGATCCACCATTCCGGGTCGGTAACTTATGAGG |
| Seq-6 | CGTCGATGTCGTTCGGTGTGCATTGGTCCTCATTCGATAT |
| Seq-7 | TGGCGAGACGACTCGGCTAACTGGGTCGCATCCCCTTTCC |
| Seq-8 | CTCTCCACAATTGATCCGATGTATTTTTCGTCCTGCGATC |
| Seq-9 | CCATCCCCGATGGTCAGGGTTTAGGGTGTGGTATCTTTCA |
| Seq-10 | GGCCCCGATTGACGATGGAACCATTCGCATGGGAGGGTCC |
| Seq-11 | GTTTCCGCAAAACCAGGACTGAGCGTCTGGTTTCCAACTA |
| Seq-12 | CCCCGCCGTACCTATGAGTTGATTACGCCCTTCAGGGGCA |
| Seq-13 | GACACCGAAACCGCGGAGACTCTGGCCATCTCTACTCCAA |
| Seq-14 | GTCCGATGGATTTATCGGGCCGAGTGTTGCGTATGGGATC |
| Seq-15 | TCCGCACACTCAGTGGTATGTGTTGTACCGCGTCAGAATC |
| Seq-16 | TGCCACACCGTGGGGAGAGGATTCGTGAGATCGTTAGTGT |
| Seq-17 | CCTCGGTGAACTAACGGGTTTGCTGCTGTGGTCTTCACCC |
| Seq-18 | TCAGCGTATATGTGTGGACCGCGCCTACATTCCGGCAGTT |
| Seq-19 | AGTGGTGAACGGTCCGCGAGAGGCGCCATTAGGCATGATC |
| Seq-20 | TGAATTTCCATTCGGTCTGCACATCGGGAGGTACTTGGTA |
| Seq-21 | AGGTGAATGCGACCTCAGAACTCTTGGGGCTTTATTGGTC |
| Seq-22 | CAACGACTTCGACTCTCGGTACATTTGTCTGGGCCCTAAC |
| Seq-23 | TCTGCACTGTTCATGCAGGCAACGGTGAGTACGTATTGGT |
| Seq-24 | TGGCCGCATAATGATCCTATAGGGAGAGCAGTCCTGTTTC |
| Seq-25 | CCTCGCCTCGACTATATTCGGGCTCTTCAGTACGTCTCCA |
| Seq-26 | CTTGACCCTGGGCTGTAATTGGTAATCTTCCTCGGAGTG |
| Seq-27 | TCCTGCCCGTGAGTACGGATAAGTCGTCTAGGTTCTTTTA |
| Seq-28 | CGCCCCGCCGGACCTTACCGCATTGGCTCCTAGTGGTTTC |
| Seq-29 | GGTCTGTCAACGGTGACGTCGTTCAAGGTGGTCCCATTG |
| Seq-30 | CTCTGGGTTTGACCTCTGTGTGTGGACTGACGTTTTAGTA |
| Seq-31 | CCCGAATGATCAGTGGGCACTGTAATCTCCGTGAGTTATA |
| Seq-32 | GGACTCAGCTGGGTATGCGGTGTGTGTGGGTTTTCACCTT |
| Seq-33 | ACTGTCGAACGGTCCCCCTAGATAGAACTCTGGTCGATAG |
| Seq-34 | AACGCATGTAAATGGGGAAAGCTCGAGTCGGTATTTCGGT |
| Seq-35 | AGAATGTCGGCAGGGAATTGATCCGCCCTCTTCCGTCGGA |
| Seq-36 | ACCCCAGGTTCGCATGAAGCCGTACGGGAGTTTTTGGGAT |
| Seq-37 | GCGGAGACGGCTTGGCACGCGGATCCCAAACACTTTCACC |
| Seq-38 | ACCGGTTGCTGAAGTGTATCGGCTAGCAGGATATTTCTCA |
| Seq-39 | TTATGCCTGTCGGATGTCATGGTATTGACCTGGTGATGTA |
| Seq-40 | TCAAAGTAGGATAGGCCTTGGTCATGGCGTGTGACGGTGT |
| Seq-41 | ACAATCGTGACGGAACTATGATAAGAGGGTCGCATTCGCT |
| Seq-42 | TTCGGTCGGCGATCGTGCGCGCTTCTGGTGGTTTTATACT |
| Seq-43 | GGACCGTAGGTACAGGAGCCGGCCATGGGAGTGATACTCA |
| Seq-44 | AGCTTGCCTCGATATCGCGACATGGGGGTATTGACGTGAA |
| Seq-45 | ACCGTGTGCTACGGTGTTTCGGCTTTTGTAACGTAATCGT |
| Seq-46 | ACTTCGGTATCCGATCCTCGTCGGGAGGAACTGGACATTT |
| Seq-47 | TGAACGGAGGGCTGATAAGTACAACAGTCGACGTAGTTTC |

**Table S5** Secondary structure free energy of candidate aptamers

| Families | Sequence | Free energy of secondary structure (Kcal/mol) |
| --- | --- | --- |
|  | Seq 1(AP1) | -15.43 |
| Family 1 | Seq 16 | -11.23 |
|  | Seq 26 | -5.80 |
|  |  |  |
|  | Seq 20 | -11.79 |
|  | Seq 29 | -11.54 |
| Family 2 | Seq 35 | -14.03 |
|  | Seq 40 | -8.73 |
|  | Seq 43(AP2) | -19.08 |
|  |  |  |
|  | Seq 4 | -12.90 |
| Family 3 | Seq 23(AP3) | -17.49 |
|  | Seq 47 | -13.05 |
|  | Seq 37 | -13.03 |
|  |  |  |
|  | Seq 2 | -11.09 |
| Family 4 | Seq 42(AP4) | -13.31 |
|  | Seq 34 | -11.11 |
|  |  |  |
|  | Seq 5 | -10.39 |
|  | Seq 12 | -14.33 |
|  | Seq 17 | -10.15 |
| Family 5 | Seq 25 | -9.33 |
|  | Seq 36 | -11.76 |
|  | Seq 38 | -10.17 |
|  | Seq 45(AP5) | -14.35 |
|  |  |  |
|  | Seq 8 | -11.77 |
| Family 6 | Seq 9 | -13.86 |
|  | Seq 14 | -12.98 |
|  | Seq 27(AP6) | -16.72 |
|  |  |  |
|  | Seq 15(AP7) | -13.62 |
| Family 7 | Seq 31 | -11.25 |
|  | Seq 39 | -11.50 |
|  |  |  |
|  | Seq 11(AP8) | -16.08 |
| Family 8 | Seq 13 | -9.83 |
|  | Seq 18 | -9.99 |
|  | Seq 32 | -9.06 |
|  |  |  |
|  | Seq 30 | -7.85 |
| Family 9 | Seq 46(AP9) | -15.30 |
|  | Seq 41 | -10.46 |
|  |  |  |
|  | Seq 3 | -13.49 |
| Family 10 | Seq 19(AP10) | -17.25 |
|  | Seq 33 | -8.93 |
|  |  |  |
|  | Seq 6(AP11) | -11.79 |
| Family 11 | Seq 21 | -9.37 |
|  | Seq 28 | -11.02 |
|  | Seq 44 | -11.36 |
|  |  |  |
| Family 12 | Seq 10(AP12) | -12.35 |
|  | Seq 22 | -9.22 |
|  |  |  |
| Family 13 | Seq 7(AP13) | -13.68 |
|  | Seq 24 | -12.07 |

## 3.Sample Pretreatment

## Water Samples

A 200 mL water sample (measured accurately to 0.01 mL) was transferred to a 250 mL wide-mouth bottle and centrifuged at 15,000 rpm for 20 min to remove impurities. The supernatant was filtered through a 0.22 µm membrane. The filtrate was evaporated to dryness under a gentle nitrogen stream, after which the residue was redissolved in 5 mL of binding buffer and filtered again through a 0.22 µm membrane.

## Soil Samples

Soil samples (5 g, weighed accurately to 0.01 g) were placed in a 50 mL centrifuge tube, vortex-mixed for 1 min, and extracted with 10 mL of formic acid-methanol solution for 15 min. The mixture was centrifuged at 15,000 rpm for 10 min, and the supernatant was transferred to a 50 mL pear-shaped flask. The residue was re-extracted with 10 mL of formic acid-methanol solution. The combined extracts were filtered through a 0.22 µm membrane, evaporated to dryness under a nitrogen stream, and reconstituted in 5 mL of binding buffer, followed by filtration through a 0.22 µm membrane prior to analysis.
