# Supplementary material
Source: Research Square preprint supplement (doi:10.21203/rs.3.rs-9174718/v1)
Supplement: Supplementary file 3 [file a1176d7ec748f94acafdfc2d.docx]

**Table 1** Binding free energy of the aptamer sequence and nitrofuran family in molecular docking

| Label | NFT | NFZ | FZD | FTD | AHD | SEM | AMOZ | AOZ |
| --- | --- | --- | --- | --- | --- | --- | --- | --- |
| AP1 | -7.635 | -6.267 | -4.246 | -5.606 | -4.677 | -3.892 | -5.791 | -4.287 |
| AP2 | -7.984 | -5.548 | -5.956 | -4.567 | -5.118 | -3.663 | -6.015 | -4.39 |
| AP3 | -8.572 | -4.497 | -4.456 | -4.274 | -5.482 | -4.116 | -3.828 | -4.77 |
| AP4 | -7.333 | -3.905 | -5.718 | -7.401 | -4.973 | -3.69 | -4.324 | -4.876 |
| AP5 | -7.511 | -4.424 | -5.56 | -6.532 | -4.274 | -3.462 | -5.794 | -4.132 |
| AP6 | -7.832 | -4.912 | -3.323 | -5.655 | -4.572 | -4.323 | -5.602 | -3.159 |
| AP7 | -6.073 | -4.394 | -4.55 | -4.844 | -2.927 | -3.702 | -4.037 | -2.853 |
| AP8 | -6.904 | -4.784 | -5.981 | -6.195 | -5.38 | -4.276 | -6.033 | -4.184 |
| AP9 | -5.711 | -3.441 | -4.58 | -4.565 | -3.009 | -2.744 | -3.59 | -2.505 |
| AP10 | -6.743 | -4.551 | -5.184 | -4.395 | -4.627 | -3.735 | -4.074 | -3.66 |
| AP11 | -6.486 | -4.495 | -6.911 | -4.799 | -3.006 | -3.834 | -6.274 | -4.397 |
| AP12 | -7.828 | -3.888 | -3.561 | -4.023 | -2.855 | -4.027 | -3.624 | -2.52 |
| AP13 | -7.811 | -3.032 | -2.486 | -5.567 | -3.697 | -3.319 | -4.613 | -3.048 |

The units are kcal/mol.
